# Supplementary material for: No evidence of an association between mitochondrial DNA variants and osteoarthritis in 7393 cases and 5122 controls
Source: HighWire-hosted journal article supplement (doi:10.1136/annrheumdis-2012-201932), 2012-09-15
Supplement: annrheumdis-2012-201932supp.pdf [file annrheumdis-2012-201932supp.pdf]

## Online Supplementary Material

### Materials and Methods

**Study subjects.** Case ascertainment has been described previously<sup>2</sup>. In brief, cases that were subjected to the GWAS and used in this study were collected from eight locations in the arcOGEN consortium (Edinburgh, London, Nottingham, Newcastle, Oxford, Sheffield, Southampton and Wansbeck (Northumbria NHS Foundation Trust)). All cases were collected in the UK, were unrelated and of European origin. The phenotype was determined by two criteria; radiographic evidence of disease and clinical evidence of disease to a level requiring joint replacement. Each investigator defined radiographic disease as a Kellgren-Lawrence (KL)<sup>18</sup> grade of  $\geq 2$ . We used 5122 publicly available population-based UK controls from the Wellcome Trust Case Control Consortium 2 (WTCC2) study: the 1958 Birth Cohort (WTCCC-58C) and the UK Blood Service control group (WTCCC-NBS) forming part of the Wellcome Trust Case Control Consortium study and genotyped in WTCCC2.

**mtDNA Haplogroup determination.** The hierarchical relationship amongst mtDNA variants is represented at [www.phylotree.org](http://www.phylotree.org). Each array variant (n=36, post QC), in each subject (n=12515, post QC), was compared to the rCRS and used to identify haplogroup specific motifs. Assignment of haplogroup was performed according to published criteria (Torroni 1996), for example haplogroup J is defined by variants m.11251 *and* [m.295+m.489+m.10398] (Supplementary Table 1). If a no-call was detected in a major-haplogroup defining SNP, then clade specific sub-type variants were used to identify mtDNA haplogroup. Based on available genotyping data 98.48% of subjects were assigned to a European haplogroup.

**Table S1. European haplogroup definitions for Illumina array genotyping data.** Table showing the major European haplogroups (H, V, J, T, U, K, W, X, I,) and corresponding sub-haplogroups. Shown are the non-rCRS (thus, non-haplogroup-H) branch SNPs, array specific ‘super-haplogroup’ SNPs (i.e. JT=11251), and array specific haplogroup defining SNPs (i.e. J=295+489+10398).

| <i>Major European haplogroups</i> | <i>rCRS Branch SNPs</i>             | <i>‘Super-haplogroup’ SNPs</i>               | <i>Array haplogroup SNPs</i> |
|-----------------------------------|-------------------------------------|----------------------------------------------|------------------------------|
| H                                 | -                                   | -                                            | -                            |
| V                                 | 750, 1438, 2706, 4769               | 15904                                        | 15904                        |
| J                                 | 750, 1438, 2706, 4769, 14766        | 11251                                        | 295, 489, 10398              |
| T                                 | 750, 1438, 2706, 4769, 14766        | 11251                                        | 4917, 10463, 15928           |
| U                                 | 750, 1438, 2706, 4769, 14766        | -                                            | 11467, 12308, 12372          |
| K (aka – U8b)                     | 750, 1438, 2706, 4769, 14766        | 11467,12308, 12372, 9698, 3480               | 10550, 14798                 |
| W                                 | 750, 1438, 2706, 4769, 14766, 12705 | 5046, 12414                                  | 5460                         |
| X                                 | 750, 1438, 2706, 4769, 14766, 12705 | -                                            | 6221, 16278                  |
| I                                 | 750, 1438, 2706, 4769, 14766, 12705 | 1719, 10238, 13780, 10398, 15043, 250, 15294 | 10034, 16129, 16391          |

  

| <i>European sub-haplogroups</i> | <i>rCRS Branch SNPs</i>             | <i>‘Super-haplogroup’ SNPs</i>                                    | <i>Array haplogroup SNPs</i> |
|---------------------------------|-------------------------------------|-------------------------------------------------------------------|------------------------------|
| I1                              | 750, 1438, 2706, 4769, 14766, 12705 | 1719, 10238, 13780, 10398, 15043, 250, 15924, 10034, 16129, 16391 | 6734                         |
| I2                              | 750, 1438, 2706, 4769, 14766, 12705 | 1719, 10238, 13780, 10398, 15043, 250, 15924, 10034, 16129, 16391 | 15758                        |
| I5                              | 750, 1438, 2706, 4769, 14766, 12705 | 1719, 10238, 13780, 10398, 15043, 250, 15924, 10034, 16129, 16391 | 14233                        |
| X1                              | 750, 1438, 2706, 4769, 14766, 12705 | 6221, 16278                                                       | 16278                        |
| X2                              | 750, 1438, 2706, 4769, 14766, 12705 | 6221, 16278                                                       | 1719                         |
| J2                              | 750, 1438, 2706, 4769, 14766        | 11251, 295, 489, 10398                                            | 15257                        |
| T1                              | 750, 1438, 2706, 4769, 14766        | 11251, 4917, 10463, 15928                                         | 16163                        |
| T2                              | 750, 1438, 2706, 4769, 14766        | 11251, 4917, 10463, 15928                                         | 14233                        |
| U5                              | 750, 1438, 2706, 4769, 14766        | 11467, 12308, 12372                                               | 16270                        |

|    |                              |                                               |       |
|----|------------------------------|-----------------------------------------------|-------|
| U6 | 750, 1438, 2706, 4769, 14766 | 11467, 12308, 12372                           | 3348  |
| K1 | 750, 1438, 2706, 4769, 14766 | 11467, 12308, 12372, 9698, 3480, 10550, 14798 | 10398 |
| K2 | 750, 1438, 2706, 4769, 14766 | 11467, 12308, 12372, 9698, 3480, 10550, 14798 | 9716  |
| V1 | 750, 1438, 2706, 4769        | 15904                                         | 8869  |
| V2 | 750, 1438, 2706, 4769        | 15904                                         | 13105 |
| V6 | 750, 1438, 2706, 4769        | 15904                                         | 16162 |
| H1 | 750, 4769, 1438              | -                                             | 3010  |
| H4 | 750, 4769, 1438              | -                                             | 5004  |

---

**Table S2. Comparison of mtDNA variant frequencies between cases and controls, stratified by gender, joint involvement, and method of ascertainment.** Ascertainment groups: hip cases only = isolated hip OA on diagnosis; knee cases only = isolated knee OA on diagnosis; both cases only = both hip and knee OA on diagnosis; X-ray = diagnosis radiologically. Uncorrected chi-squared comparison of mtDNA variant frequencies in cohort 1 (*ARCI*, n = 3093 and *WTCCC-58C*, n = 2640) and cohort 2 (*ARC2*, n = 4300 and *WTCCC-NBS*, n = 2482), stratified by i) gender, ii) affected joint type (hip, knee and both) and iii) diagnosis ascertainment (arthro=arthroplasty and X-ray). The number of association tests reaching a nominal significance level are shown below the number of cases and controls contributing to each specific stratification. Uncorrected = uncorrected P-value; corrected (x48) = corrected for 48 different SNPs; and corrected (x336) = corrected for 99 different SNPs and each one of the seven phenotypic groups in two cohorts. n.a.= not available.

|                    |                   | <b>Cohort 1</b> |                |              |              |              |               |              | <b>Cohort 2</b> |                |              |              |              |               |              |          |
|--------------------|-------------------|-----------------|----------------|--------------|--------------|--------------|---------------|--------------|-----------------|----------------|--------------|--------------|--------------|---------------|--------------|----------|
|                    |                   | <i>Males v</i>  | <i>Females</i> | <i>Hip</i>   | <i>Knee</i>  | <i>Both</i>  | <i>Arthro</i> | <i>X-ray</i> | <i>Males v</i>  | <i>Females</i> | <i>Hip</i>   | <i>Knee</i>  | <i>Both</i>  | <i>Arthro</i> | <i>X-ray</i> |          |
|                    |                   | <i>v</i>        | <i>v</i>       | <i>cases</i> | <i>cases</i> | <i>cases</i> | <i>cases</i>  | <i>cases</i> | <i>v</i>        | <i>v</i>       | <i>cases</i> | <i>cases</i> | <i>cases</i> | <i>cases</i>  | <i>cases</i> |          |
|                    |                   | <i>Males</i>    | <i>Females</i> | <i>only</i>  | <i>only</i>  | <i>only</i>  | <i>only</i>   | <i>only</i>  | <i>Males</i>    | <i>Females</i> | <i>only</i>  | <i>only</i>  | <i>only</i>  | <i>only</i>   | <i>only</i>  |          |
| <i>Cases n=</i>    |                   | 1136            | 1936           | 1503         | 1398         | 192          | 676           | 1270         | 1793            | 2507           | 1782         | 2071         | 447          | 3969          | 331          |          |
| <i>Controls n=</i> |                   | 1363            | 1277           | 2640         | 2640         | 2640         | 2640          | 2640         | 1228            | 1254           | 2482         | 2482         | 2482         | 2482          | 2482         |          |
| Uncorrected        | <i>P</i> < 0.05   | 1               | 7              | 3            | 3            | 1            | 3             | 2            | 2               | 4              | 4            | 6            | 4            | 8             | 1            |          |
| Corrected (x48)    | <i>P</i> < 0.001  | 0               | 0              | 0            | 0            | 0            | 0             | 0            | 0               | 0              | 0            | 0            | 0            | 0             | 0            |          |
| Corrected (x336)   | <i>P</i> < 0.0001 | 0               | 0              | 0            | 0            | 0            | 0             | 0            | 0               | 0              | 0            | 0            | 0            | 0             | 0            |          |
| <b>Array ID</b>    | <b>rCRS</b>       | <b>P</b>        | <b>P</b>       | <b>P</b>     | <b>P</b>     | <b>P</b>     | <b>P</b>      | <b>P</b>     | <b>P</b>        | <b>P</b>       | <b>P</b>     | <b>P</b>     | <b>P</b>     | <b>P</b>      | <b>P</b>     | <b>P</b> |
| MitoC295T          | 295               | 0.600           | 0.724          | 0.393        | 0.922        | 0.512        | 0.586         | 0.701        | 0.112           | 0.790          | 0.117        | 0.265        | 0.597        | 0.260         | 0.160        |          |
| MitoT491C          | 489               | 0.854           | 0.322          | 0.771        | 0.268        | 0.606        | 0.468         | 0.461        | 0.315           | 0.611          | 0.375        | 0.825        | 0.285        | 0.851         | 0.356        |          |
| MitoG752A          | 750               | 0.311           | 0.710          | 0.039        | 0.846        | 0.644        | 0.306         | 0.610        | 0.338           | 0.688          | 0.328        | 0.925        | 0.836        | 0.707         | 0.509        |          |
| MitoG1440A         | 1438              | 0.220           | 0.938          | 0.072        | 0.400        | 0.324        | 0.123         | 0.568        | 0.513           | 0.639          | 0.539        | 0.511        | 0.672        | 0.387         | 0.791        |          |
| MitoG1721A         | 1719              | 0.842           | 0.217          | 0.579        | 0.487        | 0.914        | 0.585         | 0.535        | 0.451           | 0.337          | 0.825        | 0.894        | 0.848        | 0.750         | 0.687        |          |
| MitoT2160C         | 2158              | 0.954           | 0.088          | 0.345        | 0.391        | 0.228        | 0.310         | 0.274        | 0.427           | 0.705          | 0.149        | 0.851        | 0.809        | 0.565         | 0.224        |          |
| MitoG2708A         | 2706              | 0.728           | 0.986          | 0.211        | 0.297        | 0.315        | 0.507         | 0.383        | 0.991           | 0.789          | 0.527        | 0.889        | 0.079        | 0.814         | 0.625        |          |
| MitoG3012A         | 3010              | 0.563           | 0.399          | 0.773        | 0.199        | 0.198        | 0.495         | 0.207        | 0.319           | 0.463          | 0.278        | 0.511        | 0.830        | 0.951         | 0.326        |          |

|             |       |       |       |       |       |       |       |       |       |             |             |       |             |             |             |
|-------------|-------|-------|-------|-------|-------|-------|-------|-------|-------|-------------|-------------|-------|-------------|-------------|-------------|
| MitoA3349G  | 3348  | 0.063 | 0.064 | 0.068 | 0.040 | 0.046 | 0.026 | 0.060 | 0.086 | 0.064       | 0.041       | 0.026 | 0.048       | 0.070       | 0.526       |
| MitoT3395C  | 3394  | 0.622 | 0.451 | 0.442 | 0.892 | 0.273 | 0.893 | 0.825 | 0.503 | 0.864       | 0.348       | 0.933 | 0.375       | 0.724       | 0.893       |
| MitoA3481G  | 3480  | 0.812 | 0.629 | 0.596 | 0.545 | 0.904 | 0.412 | 0.246 | 0.380 | 0.230       | 0.491       | 0.254 | 0.736       | 0.621       | 0.583       |
| MitoT4337C  | 4336  | 0.326 | 0.765 | 0.859 | 0.864 | 0.127 | 0.439 | 0.152 | 0.047 | 0.253       | <i>n.a.</i> | 0.944 | 0.253       | 0.032       | 0.490       |
| MitoT4562C  | 4561  | 0.322 | 0.387 | 0.542 | 0.820 | 0.763 | 0.421 | 0.602 | 0.069 | 0.140       | 0.070       | 0.130 | 0.335       | 0.017       | 0.659       |
| MitoA4918G  | 4917  | 0.699 | 0.583 | 0.420 | 0.400 | 0.773 | 0.771 | 0.662 | 0.269 | 0.162       | 0.259       | 0.243 | 0.010       | 0.500       | 0.657       |
| MitoT5005C  | 5004  | 0.433 | 0.523 | 0.273 | 0.348 | 0.428 | 0.473 | 0.308 | 0.688 | 0.377       | 0.809       | 0.235 | 0.367       | 0.240       | 0.372       |
| MitoG5047A  | 5046  | 0.089 | 0.235 | 0.801 | 0.931 | 0.744 | 0.688 | 0.824 | 0.212 | 0.455       | 0.951       | 0.827 | 0.831       | 0.616       | 0.286       |
| MitoG5461A  | 5460  | 0.168 | 0.931 | 0.769 | 0.159 | 0.964 | 0.542 | 0.279 | 0.219 | 0.216       | 0.898       | 0.573 | 0.866       | 0.933       | 0.307       |
| MitoA5657G  | 5656  | 0.923 | 0.224 | 0.516 | 0.462 | 0.689 | 0.820 | 0.068 | 0.236 | 0.834       | 0.319       | 0.669 | 0.106       | 0.417       | 0.409       |
| MitoT6153C  | 6152  | 0.607 | 0.420 | 0.478 | 0.660 | 0.784 | 0.761 | 0.430 | 0.156 | 0.501       | 0.830       | 0.576 | 0.378       | 0.730       | 0.709       |
| MitoT6222C  | 6221  | 0.975 | 0.370 | 0.386 | 0.945 | 0.920 | 0.345 | 0.742 | 0.949 | 0.483       | 0.603       | 0.487 | 0.085       | 0.544       | 0.801       |
| MitoG6261A  | 6260  | 0.970 | 0.093 | 0.602 | 0.274 | 0.248 | 0.250 | 0.499 | 0.212 | 0.111       | 0.189       | 0.930 | 0.200       | 0.026       | 0.634       |
| MitoG6735A  | 6734  | 0.931 | 0.143 | 0.636 | 0.392 | 0.379 | 0.451 | 0.436 | 0.611 | 0.032       | 0.054       | 0.387 | 1.000       | 0.171       | 0.658       |
| MitoA7769G  | 7768  | 0.623 | 0.166 | 0.381 | 0.930 | 0.929 | 0.676 | 0.561 | 0.428 | 0.627       | 0.704       | 0.887 | 0.333       | 0.893       | 0.215       |
| MitoA8870G  | 8869  | 0.038 | 0.014 | 0.010 | 0.060 | 0.550 | 0.010 | 0.130 | 0.117 | 0.064       | 0.120       | 0.020 | 0.394       | 0.012       | 0.018       |
| MitoA9668G  | 9667  | 0.240 | 0.302 | 0.582 | 0.902 | 0.592 | 0.392 | 0.560 | 0.866 | 0.261       | 0.693       | 0.179 | 0.479       | 0.497       | 0.232       |
| MitoT9699C  | 9698  | 0.376 | 0.053 | 0.331 | 0.026 | 0.379 | 0.158 | 0.053 | 0.867 | 0.764       | 0.698       | 0.256 | <i>n.a.</i> | <i>n.a.</i> | 0.260       |
| MitoT9717C  | 9716  | 0.656 | 0.063 | 0.151 | 0.569 | 0.869 | 0.065 | 0.686 | 0.128 | 0.315       | 0.016       | 0.431 | 0.650       | 0.056       | 0.756       |
| MitoT9900C  | 9899  | 0.070 | 0.116 | 0.687 | 0.813 | 0.181 | 0.810 | 0.585 | 0.656 | 0.319       | 0.305       | 0.312 | 0.751       | 0.641       | <i>n.a.</i> |
| MitoT10035C | 10034 | 0.987 | 0.016 | 0.151 | 0.097 | 0.995 | 0.101 | 0.202 | 0.323 | 0.733       | 0.293       | 0.280 | 0.355       | 0.892       | 0.136       |
| MitoT10239C | 10238 | 0.846 | 0.031 | 0.237 | 0.171 | 0.928 | 0.253 | 0.178 | 0.397 | 0.727       | 0.420       | 0.400 | 0.360       | 0.874       | 0.587       |
| MitoG10399A | 10398 | 0.928 | 0.020 | 0.173 | 0.011 | 0.391 | 0.083 | 0.022 | 0.132 | <i>n.a.</i> | 0.463       | 0.365 | <i>n.a.</i> | <i>n.a.</i> | 0.165       |
| MitoT10464C | 10463 | 0.667 | 0.537 | 0.481 | 0.509 | 0.469 | 0.818 | 0.667 | 0.497 | 0.183       | 0.428       | 0.307 | 0.030       | 0.096       | 0.441       |
| MitoA10551G | 10550 | 0.761 | 0.624 | 0.571 | 0.569 | 0.916 | 0.390 | 0.260 | 0.393 | 0.319       | 0.374       | 0.262 | 0.795       | 0.715       | 0.535       |
| MitoA11252G | 11251 | 0.724 | 0.467 | 0.793 | 0.083 | 0.451 | 0.569 | 0.294 | 0.739 | 0.173       | 0.886       | 0.358 | <i>n.a.</i> | 0.147       | 0.382       |

|             |       |       |       |       |       |       |       |       |       |       |       |       |             |       |       |
|-------------|-------|-------|-------|-------|-------|-------|-------|-------|-------|-------|-------|-------|-------------|-------|-------|
| MitoA11468G | 11467 | 0.882 | 0.049 | 0.079 | 0.368 | 0.821 | 0.111 | 0.332 | 0.950 | 0.356 | 0.948 | 0.381 | 0.482       | 0.396 | 0.538 |
| MitoA12309G | 12308 | 0.943 | 0.083 | 0.103 | 0.369 | 0.975 | 0.159 | 0.600 | 0.358 | 0.039 | 0.167 | 0.038 | 0.183       | 0.017 | 0.843 |
| MitoG12373A | 12372 | 0.421 | 0.169 | 0.010 | 0.118 | 0.657 | 0.012 | 0.137 | 0.208 | 0.014 | 0.075 | 0.013 | 0.083       | 0.040 | 0.982 |
| MitoA13106G | 13105 | 0.119 | 0.267 | 0.158 | 0.417 | 0.845 | 0.091 | 0.118 | 0.786 | 0.892 | 0.015 | 0.042 | 0.235       | 0.020 | 0.837 |
| MitoA13781G | 13780 | 0.699 | 0.011 | 0.073 | 0.078 | 0.638 | 0.059 | 0.103 | 0.204 | 0.690 | 0.460 | 0.280 | 0.351       | 0.796 | 0.349 |
| MitoA14234G | 14233 | 0.677 | 0.949 | 0.368 | 0.345 | 0.920 | 0.828 | 0.784 | 0.037 | 0.033 | 0.049 | 0.025 | <i>n.a.</i> | 0.010 | 0.933 |
| MitoG15044A | 15043 | 0.679 | 0.186 | 0.208 | 0.416 | 0.947 | 0.489 | 0.158 | 0.225 | 0.943 | 0.897 | 0.394 | 0.479       | 0.593 | 0.705 |
| MitoG15258A | 15257 | 0.834 | 0.139 | 0.644 | 0.130 | 0.556 | 0.226 | 0.440 | 0.754 | 0.638 | 0.735 | 0.290 | 0.669       | 0.753 | 0.162 |
| MitoA15759G | 15758 | 0.868 | 0.820 | 0.703 | 0.689 | 0.497 | 0.937 | 0.603 | 0.469 | 0.211 | 0.509 | 0.236 | 0.177       | 0.294 | 0.067 |
| MitoC15905T | 15904 | 0.089 | 0.526 | 0.624 | 0.424 | 0.662 | 0.319 | 0.977 | 0.271 | 0.944 | 0.058 | 0.828 | 0.881       | 0.274 | 0.340 |
| MitoA15925G | 15924 | 0.680 | 0.010 | 0.154 | 0.108 | 0.319 | 0.217 | 0.038 | 0.714 | 0.943 | 0.485 | 0.741 | 0.630       | 0.633 | 0.978 |
| MitoG15929A | 15928 | 0.768 | 0.617 | 0.374 | 0.326 | 0.606 | 0.764 | 0.562 | 0.460 | 0.234 | 0.451 | 0.379 | 0.019       | 0.125 | 0.653 |
| MitoG16130A | 16129 | 0.943 | 0.055 | 0.234 | 0.213 | 0.860 | 0.159 | 0.249 | 0.526 | 0.437 | 0.172 | 0.439 | 0.774       | 0.723 | 0.502 |
| MitoA16163G | 16162 | 0.990 | 0.659 | 0.302 | 0.896 | 0.211 | 0.402 | 0.834 | 0.619 | 0.684 | 0.522 | 0.981 | 0.127       | 0.975 | 0.894 |

---

---

**Table S3. Comparison of mtDNA haplogroup frequencies between cases and controls, stratified by gender, joint involvement, and method of ascertainment** Uncorrected chi-squared comparison of haplogroup frequencies in cohort 1 (*ARCI*, n = 3093 and *WTCCC-58C*, n = 4300) and cohort 2 (*ARC2*, n = 2640 and *WTCCC-NBS*, n = 2482), stratified by; a) gender, b) affected joint type and c) diagnosis ascertainment.

a) Stratified by gender

| <i>Haplogroup</i> | Cohort 1    |               | Cohort 2    |               |
|-------------------|-------------|---------------|-------------|---------------|
|                   | <i>Male</i> | <i>Female</i> | <i>Male</i> | <i>Female</i> |
| H                 | 9.09E-01    | 6.13E-01      | 8.37E-01    | 7.53E-01      |
| V                 | 1.24E-01    | 5.67E-01      | 2.73E-01    | 9.46E-01      |
| J                 | 7.82E-01    | 2.45E-01      | 9.23E-01    | 2.90E-01      |
| T                 | 6.41E-01    | 5.21E-01      | 2.71E-01    | 1.79E-01      |
| U                 | 9.81E-01    | 7.00E-03      | 7.10E-02    | 1.76E-01      |
| K                 | 7.75E-01    | 5.77E-01      | 3.46E-01    | 2.49E-01      |
| W                 | 9.60E-02    | 2.87E-01      | 2.43E-01    | 1.45E-01      |
| X                 | 9.86E-01    | 5.17E-01      | 9.87E-01    | 1.24E-01      |
| I                 | 9.06E-01    | 1.70E-02      | 4.46E-01    | 8.99E-01      |
| O                 | 3.36E-01    | 8.70E-01      | 1.03E-01    | 8.72E-01      |

b) Stratified by joint type

| <i>Haplogroup</i> | Cohort 1   |             |             | Cohort 2   |             |             |
|-------------------|------------|-------------|-------------|------------|-------------|-------------|
|                   | <i>Hip</i> | <i>Knee</i> | <i>Both</i> | <i>Hip</i> | <i>Knee</i> | <i>Both</i> |
| H                 | 4.20E-01   | 1.53E-01    | 2.21E-01    | 3.25E-01   | 6.60E-01    | 1.17E-01    |
| V                 | 6.14E-01   | 4.90E-01    | 6.59E-01    | 5.90E-02   | 8.24E-01    | 8.78E-01    |
| J                 | 6.33E-01   | 2.19E-01    | 6.43E-01    | 9.56E-01   | 4.98E-01    | 1.04E-01    |
| T                 | 4.12E-01   | 3.71E-01    | 7.57E-01    | 2.75E-01   | 2.57E-01    | 1.00E-02    |
| U                 | 8.30E-02   | 1.81E-01    | 8.80E-01    | 3.70E-02   | 1.41E-01    | 2.07E-01    |
| K                 | 6.04E-01   | 5.39E-01    | 9.00E-01    | 4.51E-01   | 2.83E-01    | 7.65E-01    |
| W                 | 7.66E-01   | 9.66E-01    | 7.28E-01    | 8.14E-01   | 7.96E-01    | 9.99E-01    |
| X                 | 5.06E-01   | 9.02E-01    | 8.54E-01    | 7.84E-01   | 1.83E-01    | 2.40E-02    |
| I                 | 1.07E-01   | 1.47E-01    | 6.59E-01    | 4.67E-01   | 4.18E-01    | 2.70E-01    |
| O                 | 6.46E-01   | 6.43E-01    | 1.46E-01    | 3.60E-01   | 2.52E-01    | 5.21E-01    |

c) Stratified by diagnosis ascertainment

| <i>Haplogroup</i> | Cohort 1            |              | Cohort 2            |              |
|-------------------|---------------------|--------------|---------------------|--------------|
|                   | <i>Arthroplasty</i> | <i>X-ray</i> | <i>Arthroplasty</i> | <i>X-ray</i> |
| H                 | 8.56E-01            | 2.17E-01     | 7.47E-01            | 5.28E-01     |
| V                 | 3.61E-01            | 9.81E-01     | 2.77E-01            | 3.43E-01     |
| J                 | 3.91E-01            | 3.54E-01     | 3.99E-01            | 6.28E-01     |
| T                 | 7.72E-01            | 6.29E-01     | 5.50E-02            | 6.49E-01     |
| U                 | 2.19E-01            | 6.40E-02     | 2.00E-02            | 8.88E-01     |
| K                 | 4.20E-01            | 2.43E-01     | 6.78E-01            | 5.59E-01     |
| W                 | 6.53E-01            | 8.58E-01     | 9.56E-01            | 2.23E-01     |
| X                 | 4.17E-01            | 7.28E-01     | 2.42E-01            | 8.99E-01     |
| I                 | 1.07E-01            | 1.50E-01     | 8.14E-01            | 6.31E-01     |
| O                 | 5.53E-01            | 4.60E-01     | 1.94E-01            | 9.75E-01     |

**Table S4. Chi-squared tests of association between groups of principal component analysis (PCA) clusters and disease in cohort 1 (ARC1 versus WTCCC 58C), cohort 2 (ARC2 versus WTCCC-NBS) and combined cases and controls.** Uncorrected chi-squared comparison of PCA-cluster frequencies in cohort 1 (*ARC1*, n = 3099 and *WTCCC-58C*, n = 2618), cohort 2 (*ARC2*, n = 4311 and *WTCCC-NBS*, n = 2434), and combined cases (*ARC1+ARC2*, n=7410) versus combined controls (*WTCCC-58c+-NBS*, n=5052).

| <i>PCA Cluster</i> | <i>Cohort 1</i> |                    |          | <i>Cohort 2</i> |                  |          | <i>Combined</i> |               |          |
|--------------------|-----------------|--------------------|----------|-----------------|------------------|----------|-----------------|---------------|----------|
|                    | <i>F ARC1</i>   | <i>F WTCCC-58C</i> | <i>P</i> | <i>F ARC2</i>   | <i>WTCCC-NBS</i> | <i>P</i> | <i>F Cases</i>  | <i>F Con.</i> | <i>P</i> |
| 1                  | 400             | 300                | 1.0E-01  | 509             | 330              | 4.0E-02  | 909             | 630           | 7.6E-01  |
| 2                  | 55              | 57                 | 3.2E-01  | 77              | 51               | 4.2E-01  | 132             | 108           | 2.0E-01  |
| 3                  | 85              | 96                 | 5.6E-02  | 122             | 70               | 9.7E-01  | 207             | 166           | 1.3E-01  |
| 4                  | 534             | 410                | 1.2E-01  | 701             | 389              | 7.9E-01  | 1235            | 799           | 2.5E-01  |
| 5                  | 1071            | 926                | 5.4E-01  | 1543            | 850              | 4.9E-01  | 2614            | 1776          | 9.0E-01  |
| 6                  | 330             | 294                | 5.1E-01  | 514             | 290              | 9.9E-01  | 844             | 584           | 7.9E-01  |
| 7                  | 221             | 201                | 4.6E-01  | 291             | 178              | 4.1E-01  | 512             | 379           | 2.2E-01  |
| 8                  | 40              | 32                 | 9.0E-01  | 40              | 28               | 4.5E-01  | 80              | 60            | 6.3E-01  |
| 9                  | 59              | 39                 | 2.7E-01  | 70              | 28               | 1.5E-01  | 129             | 67            | 8.0E-02  |
| 10                 | 304             | 263                | 8.0E-01  | 444             | 220              | 1.0E-01  | 748             | 483           | 3.4E-01  |
|                    | 3099            | 2618               |          | 4311            | 2434             |          | 7410            | 5052          |          |
